# Supplementary material for: Improving accessibility to radiotherapy services in Cali, Colombia: cross-sectional equity analyses using open data and big data travel times from 2020
Source: PubMed Central journal article supplement (PMC11325712; doi:10.1186/s12939-024-02211-6), 2024-08-15
Supplement: 12939_2024_2211_MOESM5_ESM.pdf [file 12939_2024_2211_MOESM5_ESM.pdf]

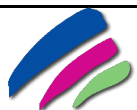

CUENTA DE ALTO COSTO  
Fondo Colombiano de Enfermedades de Alto Costo

Cuenta de Alto Costo  
Solicitud de información CAC\_5376

| Estimación                                                 | Periodo | Tipo de cáncer          | Casos que recibieron radioterapia (n) | Total de casos (n) | %     |
|------------------------------------------------------------|---------|-------------------------|---------------------------------------|--------------------|-------|
| Proporción de casos incidentes que recibieron radioterapia | 2021    | Cérvix                  | 41                                    | 111                | 36.94 |
| Proporción de casos incidentes que recibieron radioterapia | 2021    | Colorrectal             | 42                                    | 242                | 17.36 |
| Proporción de casos incidentes que recibieron radioterapia | 2021    | Estómago                | 26                                    | 183                | 14.21 |
| Proporción de casos incidentes que recibieron radioterapia | 2021    | Linfoma Hodgkin         | 6                                     | 35                 | 17.14 |
| Proporción de casos incidentes que recibieron radioterapia | 2021    | Leucemia Linfoide Aguda | 0                                     | 29                 | 0.00  |
| Proporción de casos incidentes que recibieron radioterapia | 2021    | Leucemia Mieloide Aguda | 2                                     | 33                 | 6.06  |
| Proporción de casos incidentes que recibieron radioterapia | 2021    | Mama                    | 122                                   | 551                | 22.14 |
| Proporción de casos incidentes que recibieron radioterapia | 2021    | Melanoma                | 2                                     | 34                 | 5.88  |
| Proporción de casos incidentes que recibieron radioterapia | 2021    | Linfoma no Hodgkin      | 6                                     | 136                | 4.41  |
| Proporción de casos incidentes que recibieron radioterapia | 2021    | Otros                   | 195                                   | 1,668              | 11.69 |
| Proporción de casos incidentes que recibieron radioterapia | 2021    | Próstata                | 59                                    | 258                | 22.87 |
| Proporción de casos incidentes que recibieron radioterapia | 2021    | Pulmón                  | 26                                    | 95                 | 27.37 |
| Proporción de casos incidentes que recibieron radioterapia | 2021    | Total                   | 527                                   | 3,375              | 15.61 |

|         |      |                                                                                                   |
|---------|------|---------------------------------------------------------------------------------------------------|
| Periodo | 2021 | Corresponde al periodo de reporte comprendido entre el 02 de enero de 2020 al 01 de enero de 2021 |
|---------|------|---------------------------------------------------------------------------------------------------|

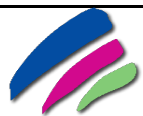

CUENTA DE ALTO COSTO  
Fondo Colombiano de Enfermedades de Alto Costo

Cuenta de Alto Costo  
Solicitud de información CAC\_5376

| Estimación                                                         | Periodo | Tipo de cáncer          | Número de casos con información | Promedio de sesiones | Desviación estándar |
|--------------------------------------------------------------------|---------|-------------------------|---------------------------------|----------------------|---------------------|
| Promedio del número de sesiones de radioterapia por tipo de cáncer | 2021    | Cérvix                  | 40                              | 25.43                | 9.70                |
| Promedio del número de sesiones de radioterapia por tipo de cáncer | 2021    | Colorrectal             | 41                              | 21.49                | 11.77               |
| Promedio del número de sesiones de radioterapia por tipo de cáncer | 2021    | Estómago                | 26                              | 12.54                | 10.32               |
| Promedio del número de sesiones de radioterapia por tipo de cáncer | 2021    | Linfoma Hodgkin         | 6                               | 14.33                | 8.89                |
| Promedio del número de sesiones de radioterapia por tipo de cáncer | 2021    | Leucemia Mieloide Aguda | 2                               | 2.00                 | 0.00                |
| Promedio del número de sesiones de radioterapia por tipo de cáncer | 2021    | Mama                    | 121                             | 8.28                 | 5.07                |
| Promedio del número de sesiones de radioterapia por tipo de cáncer | 2021    | Melanoma                | 2                               | 17.50                | 17.68               |
| Promedio del número de sesiones de radioterapia por tipo de cáncer | 2021    | Linfoma no Hodgkin      | 7                               | 12.71                | 9.39                |
| Promedio del número de sesiones de radioterapia por tipo de cáncer | 2021    | Otros                   | 196                             | 14.12                | 13.49               |
| Promedio del número de sesiones de radioterapia por tipo de cáncer | 2021    | Próstata                | 59                              | 19.44                | 13.95               |
| Promedio del número de sesiones de radioterapia por tipo de cáncer | 2021    | Pulmón                  | 25                              | 8.84                 | 7.44                |
| Promedio del número de sesiones de radioterapia por tipo de cáncer | 2021    | Total                   | 525                             | 14.43                | 12.24               |

|                |             |                                                                                                   |
|----------------|-------------|---------------------------------------------------------------------------------------------------|
| <b>Periodo</b> | <b>2021</b> | Corresponde al periodo de reporte comprendido entre el 02 de enero de 2020 al 01 de enero de 2021 |
|----------------|-------------|---------------------------------------------------------------------------------------------------|

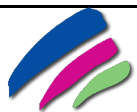

CUENTA DE ALTO COSTO  
Fondo Colombiano de Enfermedades de Alto Costo

Cuenta de Alto Costo  
Solicitud de información CAC\_5376

Intención del tratamiento del primer o único esquema de radioterapia (casos incidentes), Cali 2021

| Tipo de Cáncer          | Número de casos nuevos |                                                    |            |                   |                                  |                  |                 | Total      |
|-------------------------|------------------------|----------------------------------------------------|------------|-------------------|----------------------------------|------------------|-----------------|------------|
|                         | Neoadyuvancia          | Tratamiento Inicial curativo, sin cirugía sugerida | Adyuvancia | Manejo de recaída | Manejo de enfermedad metastásica | Manejo paliativo | Sin información |            |
| Cérvix                  | 8                      | 10                                                 | 7          | 15                | 0                                | 0                | 1               | 41         |
| Colorrectal             | 11                     | 3                                                  | 6          | 13                | 3                                | 5                | 1               | 42         |
| Estómago                | 3                      | 0                                                  | 9          | 2                 | 7                                | 5                | 0               | 26         |
| Linfoma Hodgkin         | 0                      | 1                                                  | 2          | 2                 | 1                                | 0                | 0               | 6          |
| Leucemia Mieloide Aguda | 0                      | 2                                                  | 0          | 0                 | 0                                | 0                | 0               | 2          |
| Mama                    | 8                      | 3                                                  | 68         | 28                | 10                               | 3                | 2               | 122        |
| Melanoma                | 0                      | 0                                                  | 1          | 0                 | 0                                | 1                | 0               | 2          |
| Linfoma no Hodgkin      | 1                      | 2                                                  | 0          | 0                 | 3                                | 0                | 0               | 6          |
| Otros                   | 23                     | 15                                                 | 102        | 28                | 23                               | 3                | 1               | 195        |
| Próstata                | 11                     | 10                                                 | 10         | 9                 | 8                                | 10               | 1               | 59         |
| Pulmón                  | 5                      | 1                                                  | 0          | 1                 | 16                               | 2                | 1               | 26         |
| <b>Total</b>            | <b>70</b>              | <b>47</b>                                          | <b>205</b> | <b>98</b>         | <b>71</b>                        | <b>29</b>        | <b>7</b>        | <b>527</b> |

|         |      |                                                                                                   |  |
|---------|------|---------------------------------------------------------------------------------------------------|--|
| Periodo | 2021 | Corresponde al periodo de reporte comprendido entre el 02 de enero de 2020 al 01 de enero de 2021 |  |
|---------|------|---------------------------------------------------------------------------------------------------|--|
